# Supplementary material for: Enhancing Irrigation Salinity Stress Tolerance and Increasing Yield in Tomato Using a Precision Engineered Protein Hydrolysate and Ascophyllum nodosum-Derived Biostimulant
Source: MDPI journal article supplement (doi:10.3390/agronomy12040809), 2022-03-27
Supplement: s1 [file s1]

Archive with 1 entries (1 files):
- Supplementary info salinity PSI475 paper EI OG.pdf
